# Supplementary material for: Kinetics of inhibition of firefly luciferase by oxyluciferin and dehydroluciferyl-adenylate
Source: Royal Society of Chemistry journal article supplement (doi:10.1039/b809935a), 2008-08-01

## **Kinetics of Inhibition of Firefly Luciferase by Oxyluciferin and Dehydroluciferyl-adenylate**

César Ribeiro and Joaquim C.G. Esteves da Silva\*

Centro de Investigação em Química (UP), Departamento de Química, Faculdade de  
Ciências da Universidade do Porto, R. Campo Alegre 687, 4169-007 Porto, Portugal

*Phone: + 351-220402569, Fax: +351-220402659, E-mail: jcsilva@fc.up.pt*

### **Supplementary Data**

Experimental results obtained for the chemical characterization of oxyluciferin and L-AMP.

Figure S1: Positive ionization mass spectra of chemically synthesized (a) oxyluciferin (Mw = 250.3) and (b) L-AMP (Mw = 607.5).

Oxy #209-222 RT: 3.36-3.48 AV: 14 NL: 7.82E6  
T: +p ESI Full ms [90.00-500.00]

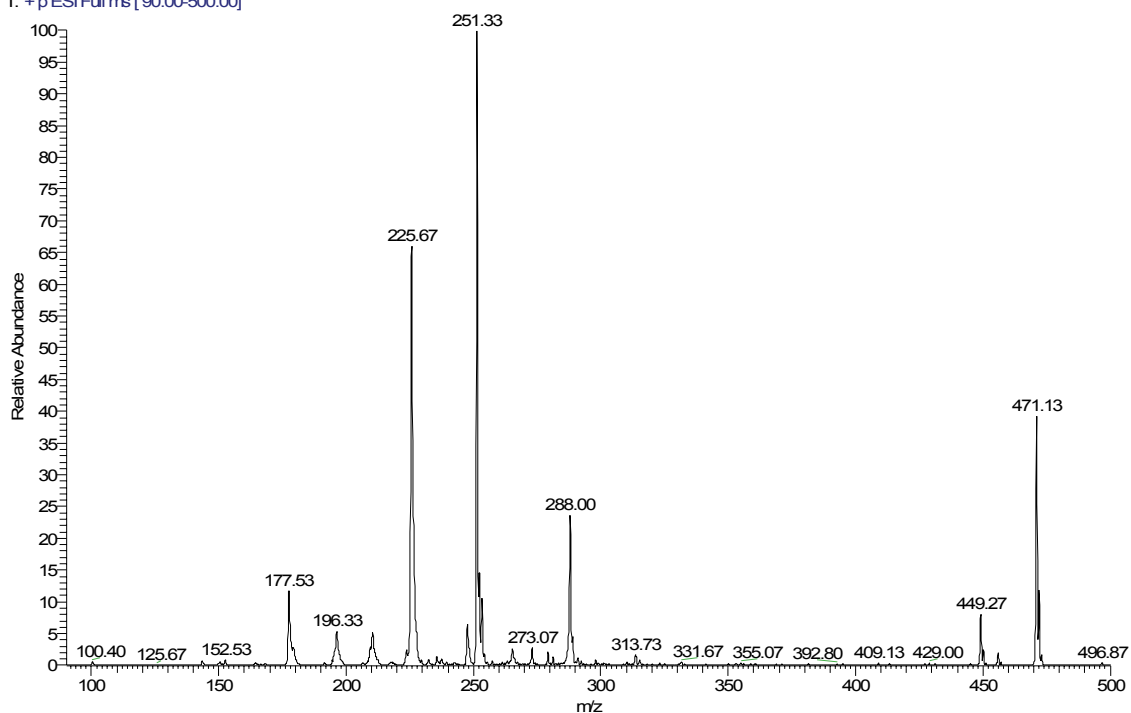

a)

LAMP #146-156 RT: 4.00-4.28 AV: 11 NL: 1.85E6  
T: +p ESI Full ms [75.00-2000.00]

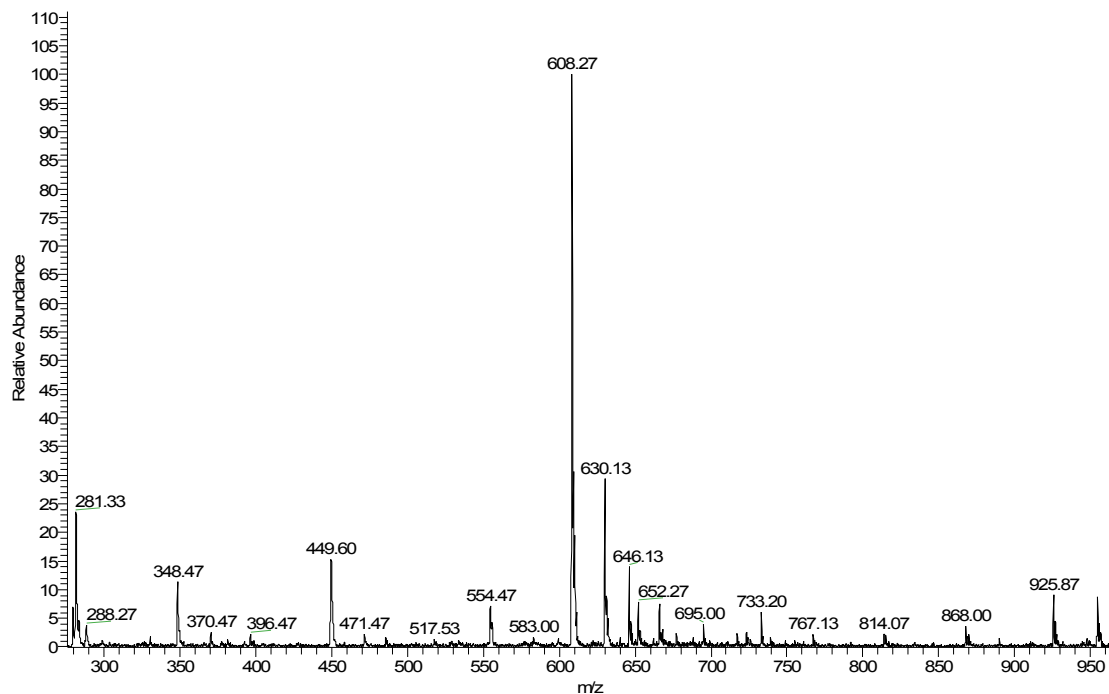

b)

Figure S2: Reversed phase chromatograms of the chemically synthesized (a) oxyluciferin and (b) L-AMP (injection volume = 20  $\mu$ L). The eluent solutions used were mixtures containing methanol in water (28% v/v) and phosphate buffer (7 mM, pH 7.0) and the flow rate was set to 1 mL/min. The chromatographic system consisted of a HP-1100 isocratic pump, a Rheodyne manual injection valve, a Chromolith C18 column (Merck), and a Thermo Finnigan UV6000 LP diode array detector with a 50 mm LightPipe flowcell.

Purity calculations were based on at least three independent experiments.

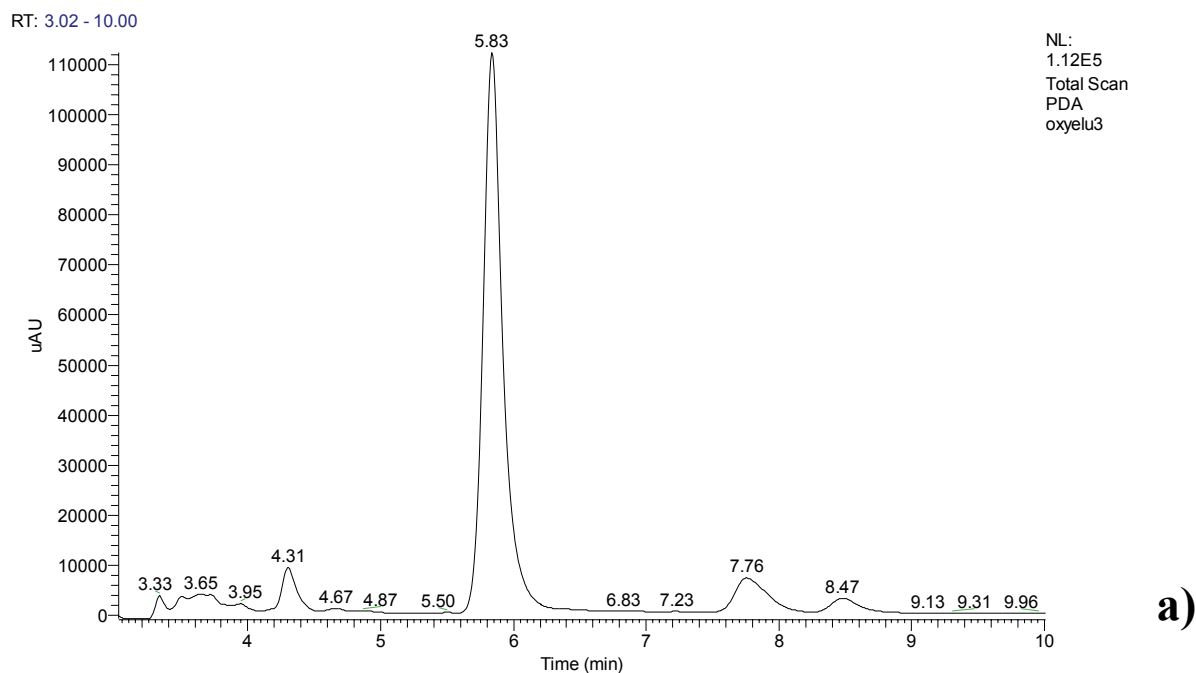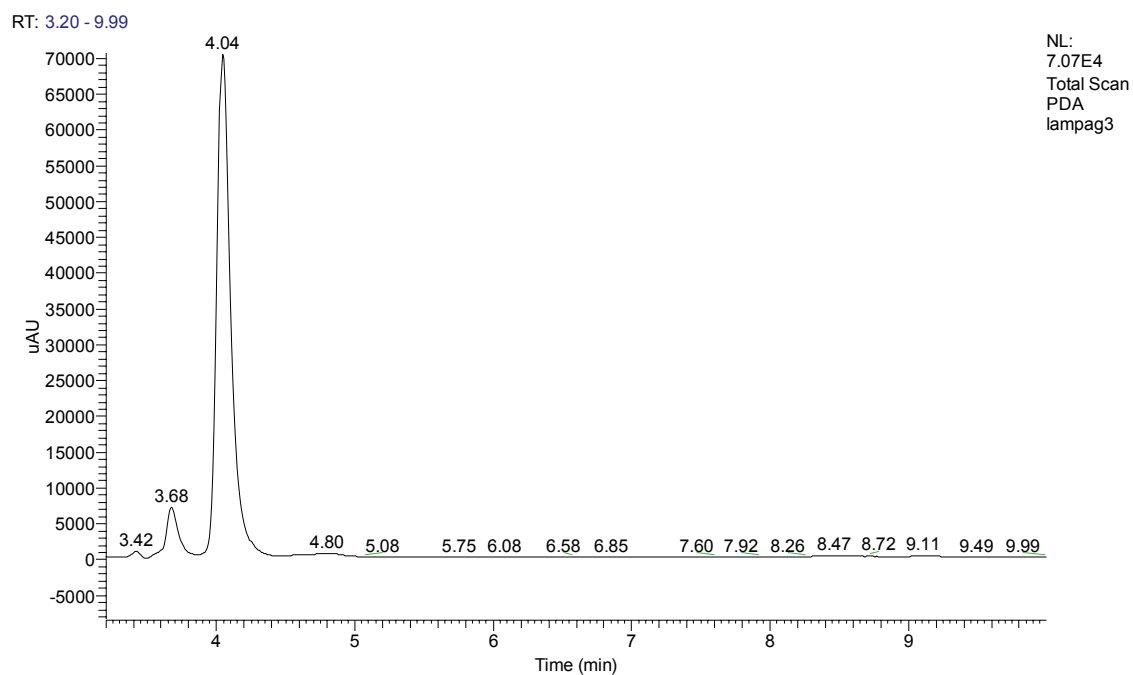

Supplement: b809935a.pdf [file b809935a.pdf]
